# Supplementary material
Source: HighWire-hosted journal article supplement (https://bmjopen.bmj.com/content/12/6/e060431)
Supplement: inline-supplementary-material-2 [file inline-supplementary-material-2.pdf]

Proefpersoneninformatie

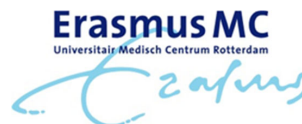

## Proefpersoneninformatie voor deelname aan medisch-wetenschappelijk onderzoek

### REACTiVe-2 studie: combinatie immunotherapie voor patiënten met uitgezaaide alveesklieerkanker

*Officiële titel: Dendritische cellen beladen met allogeen tumor lysaat (MesoPher) in combinatie met een CD40 agonist (Mitazalimab) voor patiënten met gemetastaseerd pancreaskanker die progressie van ziekte hebben onder standaardbehandeling met FOLFIRINOX.*

#### Inleiding

Geachte heer/mevrouw,

Met deze informatiebrief willen we u vragen of u wilt meedoen aan medisch-wetenschappelijk onderzoek. Meedoen is vrijwillig. U krijgt deze brief omdat u uitgezaaide alveesklieerkanker heeft. Helaas is gebleken dat ondanks de behandeling uw ziekte groeit. U komt in aanmerking om deel te nemen aan dit onderzoek waar we u willen behandelen met een combinatie van 2 immunotherapieën. We zullen een celtherapie toepassen, dit hebben we eerder gedaan bij alveesklieerkanker patiënten na een operatie. Voor het maken van deze celtherapie gebruiken we uw eigen witte bloedcellen. Deze witte bloedcellen worden uit uw bloed gehaald en buiten het lichaam gekweekt tot dendritische cellen en opgeladen met een hulpstof. Deze hulpstof is gemaakt uit cellijnen met mesothelioom cellen. Deze tumorcellen zijn kapot gemaakt, waardoor ze niet meer actief kunnen zijn. De dendritische cellen worden hiermee opgeladen en dan weer terug gespoten in het lichaam. Het middel wat we terugspuiten heet MesoPher. Daarnaast krijgt u een infuus met een CD40 agonist, dit is een nieuw middel en heet mitazalimab. De bovengenoemde termen zijn ingewikkeld en later volgt meer uitleg. U leest hier om wat voor onderzoek het gaat, wat het voor u betekent, en wat de voordelen en nadelen kunnen zijn. Het is veel informatie. Wilt u de informatie doorlezen en beslissen of u wilt meedoen? Als u wilt meedoen, kunt u samen met de arts het formulier invullen dat u vindt in **bijlage H**.

#### Stel uw vragen

U kunt uw beslissing nemen met de informatie die u in deze informatiebrief vindt. Daarnaast raden we u aan om dit te doen:

- Stel vragen aan de onderzoeker die u deze informatie geeft.
- Praat met uw partner, familie of vrienden over dit onderzoek.
- Stel vragen aan de onafhankelijk deskundige, Prof. dr. M.H.J. Verhofstad.
- Lees de informatie op [www.rijksoverheid.nl/mensenonderzoek](http://www.rijksoverheid.nl/mensenonderzoek).

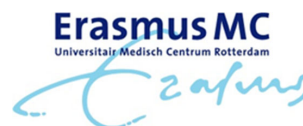

Proefpersoneninformatie

## 1. Algemene informatie

Het Erasmus MC heeft dit onderzoek opgezet. Hieronder noemen we het Erasmus MC steeds de 'opdrachtgever'.

Onderzoekers, dit kunnen artsen/onderzoekers of onderzoeksverpleegkundigen zijn, voeren het onderzoek uit in het Erasmus MC.

Alligator Bioscience AB en Amphera B.V. dragen deels bij aan dit onderzoek door het leveren van de onderzoeksmedicatie.

Voor dit onderzoek zijn maximaal 18 proefpersonen nodig. De medisch-ethische toetsingscommissie van de Centrale Commissie Mensgebonden Onderzoek (CCMO) heeft dit onderzoek goedgekeurd.

## 2. Wat is het doel van het onderzoek?

In dit onderzoek bekijken we hoe veilig de combinatietherapie is. Hierbij gaan we op zoek naar de dosis van de nieuwe medicatie (CD40 agonist: mitazalimab) die we veilig aan de cel therapie (MesoPher) kunnen toevoegen. Ook zijn we geïnteresseerd naar het effect op het immuunsysteem van patiënten en we hopen een eerste indruk te krijgen of de behandeling effectief is. Van beide middelen is de effectiviteit in de behandeling tegen alveesklierkanker nog onduidelijk. Deelname aan de studie is dus met name om meer kennis te ontwikkelen over mogelijke nieuwe behandelingen voor alveesklierkanker.

## 3. Wat is de achtergrond van het onderzoek?

De behandeling die we gaan onderzoeken hebben we hiervoor onderzocht in het laboratorium met een muismodel voor alveesklierkanker. De combinatie van MesoPher en de mitazalimab versterkte de afweer reactie tegen de tumor in deze muizen. Dit was effectiever dan het los geven van de MesoPher of de mitazalimab. Omdat beide middelen als ze los gegeven worden veilig zijn bij mensen willen we nu de 2 behandelingen tegelijkertijd geven om te kijken of bij mensen deze 2 behandelingen samen ook veilig te gebruiken zijn en elkaar ook versterken in de behandeling van kanker. Beide middelen worden alleen nog maar in onderzoeksverband aan patiënten met alveesklierkanker gegeven. Voor een uitgebreidere uitleg van de achtergrond van het onderzoek verwijzen we u naar **bijlage D**.

## 4. Hoe verloopt het onderzoek?

*Hoelang duurt het onderzoek?*

Doet u mee met het onderzoek? Dan duurt dat in totaal ongeveer 46 weken. Daarna zult u worden vervolgd zoals gebruikelijk is voor patiënten met uitgezaaide alveesklierkanker.

*Stap 1: bent u geschikt om mee te doen?*

We willen eerst weten of u geschikt bent om mee te doen. Daarom doet de onderzoeker een aantal onderzoeken:

- Lichamelijk onderzoek. De onderzoeker luistert bijvoorbeeld naar uw hart en longen en meet uw bloeddruk en hartslag.

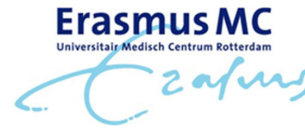

## Proefpersoneninformatie

- Bloedonderzoek. Daarvoor neemt de onderzoeker wat bloed bij u af. We testen in het bloed op verschillende soorten virussen (humaan T-lymfotroop virus I en II, HIV, Hepatitis B, Hepatitis C). We vertellen het u als u een van deze ziektes heeft. U kunt dan niet meedoen aan het onderzoek. Er wordt een zwangerschapstest gedaan bij vrouwen in de vruchtbare leeftijd.
- Onderzoek naar uw medische geschiedenis en medicijngebruik.

*Stap 2: de behandeling*

We behandelen u 5 keer met een combinatie van MesoPher en mitazalimab in een periode van 36 weken. De eerste 3 behandelingen zullen om de twee weken zijn. Dan wordt in overleg met u besloten of we doorgaan met behandeling 4 (na 3 maanden) en behandeling 5 (na 6 maanden). Het kan zijn dat u voor uw gevoel een langere periode zonder behandeling bent, dat is zo gepland omdat het afweersysteem het in die periode moet overnemen. Uw arts zal door middel van scans de tumor groei goed in de gaten houden.

Het onderzoek bestaat uit verschillende visites en we zijn ons er van bewust dat wij veel van u vragen wat betreft de onderzoeken en metingen die hierbij horen. Hieronder vindt u meer informatie over de stappen en onderzoeken binnen het onderzoek.

Voor dit onderzoek maken we 5 groepen. We starten met de behandeling van de eerste patiënten in groep 1. Hierna wordt de dosis verdubbeld als we geen ernstige bijwerkingen zien. Als we dit wel zien dan wordt de dosis gehalveerd. De voortgang van de studie bepaald in welke groep u terecht komt:

- Groep -2. De mensen in deze groep krijgen MesoPher (vaste dosering:  $25 \times 10^6$  cellen) met  $75 \mu\text{g}/\text{kg}$  mitazalimab.
- Groep -1. De mensen in deze groep krijgen MesoPher (vaste dosering:  $25 \times 10^6$  cellen) met  $150 \mu\text{g}/\text{kg}$  mitazalimab.
- Groep 1. De mensen in deze groep krijgen MesoPher (vaste dosering:  $25 \times 10^6$  cellen) met  $300 \mu\text{g}/\text{kg}$  mitazalimab.
- Groep 2. De mensen in deze groep krijgen MesoPher (vaste dosering:  $25 \times 10^6$  cellen) met  $600 \mu\text{g}/\text{kg}$  mitazalimab.
- Groep 3. De mensen in deze groep krijgen MesoPher (vaste dosering:  $25 \times 10^6$  cellen) met  $1200 \mu\text{g}/\text{kg}$  mitazalimab.

In de voorgaande studies hebben we in 89% (83/93) van de producties het eindproduct van de dendritische cellen kunnen teruggeven aan de patiënt waarbij het middel voldeed aan de strenge kwaliteitseisen die we aan het product stellen. Van de 10 overige producties hebben we nog 4 producties kunnen teruggeven aan de patiënten waarbij het eindproduct niet voldeed aan de kwaliteitseisen. Hierdoor zou het product mogelijk minder goed kunnen werken.

Als dit bij u het geval blijkt te zijn, dat zal uw arts met u bespreken wat er niet voldoet aan het product. In overleg met u kunnen we besluiten om het product alsnog aan u toe te dienen. Hiervoor dient u dan samen met de behandelend arts een apart toestemmingsformulier te tekenen.



Proefpersoneninformatie

### *Stap 3: onderzoeken en metingen*

Voor het onderzoek is het nodig dat u 16 keer in 46 weken naar het ziekenhuis komt. Een bezoek duurt afhankelijk van welke handelingen worden verricht tussen de 15 minuten en 4 uur.

We doen de volgende onderzoeken:

- Lichamelijk onderzoek (volledig of gedeeltelijk): bij ieder bezoek waar u een arts of verpleegkundige ziet.
- Leukaferese. Dit is een eenmalige handeling om de witte bloedcellen die nodig zijn voor de celtherapie uit uw bloed te isoleren. Meer informatie over de leukaferese vind u in **bijlage E**.
- Onderzoek van uw bloed. Bij 14 bezoeken. Daarvoor neemt de onderzoeker per keer maximaal 10 buisjes bloed af. Alles bij elkaar nemen we dan maximaal 70 ml bloed per keer bij u af. Deze hoeveelheid geeft bij volwassenen geen problemen. Ter vergelijking: iemand die bloed geeft bij de bloedbank, geeft per keer 500 ml bloed. Met het bloedonderzoek testen we deze zaken:
  - o Hoeveel bloedcellen worden er aangemaakt door uw lichaam?
  - o Hoe goed werken uw lever en nieren?
  - o Wat is het effect geweest van de behandeling op de cellen van uw immuunsysteem?
- Tumor biopt. Er wordt 2 keer een biopt genomen van een uitzaaiing om te kunnen onderzoeken wat het immuunsysteem voor invloed heeft op de tumor. Meer informatie over de tumor biopsie vind u in **bijlage F**.
- Huidtest: In patiënten waarbij geen tweede tumor biopt kan worden uitgevoerd (soms lukt het niet om dit goed aan te prikken) dan wordt er na 3 studiebehandelingen een huidtest met een huidbiopsie gedaan. In **bijlage G** vindt u meer informatie over het huidbiopsie.
- CT scan. Er wordt 5 keer een CT scan gemaakt om te kijken naar hoe de tumor reageert op de behandeling.

In **bijlage C** staat welke handelingen we doen bij ieder bezoek.

### *Stap 4: nacontrole*

Na de laatste studie visite gaat u terug naar uw eigen arts voor de reguliere controles.

### *Wat is er anders dan bij gewone zorg?*

Indien de uitgezaaid alveeskliekkanker verder groeit onder de chemotherapie die u heeft ontvangen, dan zijn er geen behandelopties meer. De behandeling is dan met name gericht op het bestrijden van symptomen en de ziekenhuisbezoeken worden zoveel mogelijk beperkt. Als u besluit deel te nemen aan dit onderzoek zal het belangrijkste verschil zijn dat u vaker in het ziekenhuis zal zijn. U moet extra naar het ziekenhuis komen voor een behandeling met de studiemedicatie. Daarnaast moet u ook soms naar het ziekenhuis komen voor een CT scan of bijvoorbeeld een tumor biopsie.

Proefpersoneninformatie

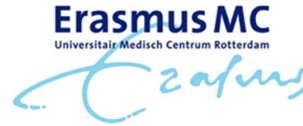

## 5. Welke afspraken maken we met u?

We willen graag dat het onderzoek goed verloopt. Daarom maken we de volgende afspraken met u:

- U doet tijdens dit onderzoek niet ook nog mee aan een ander medisch-wetenschappelijk onderzoek.
- U komt naar iedere afspraak.
- U neemt contact op met de onderzoeker in deze situaties:
  - U wilt andere medicijnen gaan gebruiken. Ook als dit homeopathische middelen zijn, natuurgeneesmiddelen, vitaminen of geneesmiddelen van de drogist.
  - U wordt in een ziekenhuis opgenomen of behandeld.
  - U krijgt plotseling problemen met uw gezondheid.
  - U wilt niet meer meedoen met het onderzoek.
  - Uw telefoonnummer, adres of e-mailadres verandert.

### *Mag u of uw partner zwanger worden tijdens het onderzoek?*

Vrouwen die zwanger zijn of borstvoeding geven, kunnen niet meedoen aan dit onderzoek. Vrouwen mogen ook niet zwanger worden tijdens het onderzoek. Bent u een man, en heeft u een vrouwelijke partner? Dan moet u ervoor zorgen dat zij niet zwanger kan worden van u.

Dit onderzoek kan namelijk gevolgen hebben voor een ongeborn kind. Het is niet bekend welke gevolgen. De onderzoeker vertelt u hoe u het beste een zwangerschap voorkomt. Praat hierover met uw partner.

### *Toch zwanger?*

#### Vrouwen

Wordt u toch zwanger tijdens het onderzoek? Laat dit dan meteen weten aan de onderzoeker. U moet dan in overleg met de onderzoeker zo snel mogelijk stoppen met dit onderzoek.

#### Mannen

Wordt uw partner zwanger van u tijdens het onderzoek? Vraag haar dan toestemming om dit aan de onderzoeker te laten weten. Dan kan de zwangerschap extra gecontroleerd worden en kan informatie over het verloop en de uitkomst van de zwangerschap bij andere hulpverleners worden opgevraagd. Maar alleen als u/ uw zwangere partner daar toestemming voor geeft. Ten slotte melden we de zwangerschap aan de opdrachtgever van dit onderzoek.

### *Zwanger worden na het onderzoek?*

De onderzoeker zal met u bespreken of deelname aan het onderzoek gevolgen kan hebben als u later zwanger wilt worden.

Proefpersoneninformatie



## 6. Van welke bijwerkingen, nadelige effecten of ongemakken kunt u last krijgen?

De onderzoeksmiddelen kunnen bijwerkingen geven.

De volgende bijwerkingen komen vaak voor:

- De leukafereze kan spontaan voorbijgaande hartkloppingen, een versnelde hartslag en een daling van de bloeddruk uitlokken. U dient dan rustig te blijven liggen tot deze klachten weer voorbij zijn. Voor meer informatie over de leukafereze zie **bijlage E**.
- MesoPher geeft in veel gevallen bijwerkingen. Ze zijn nagenoeg allemaal mild en gaan vanzelf over. We verwachten geen gevaarlijke bijwerkingen van MesoPher op basis van voorgaande onderzoeken. De belangrijkste bijwerkingen zijn kortdurend koorts of griepachtige verschijnselen op dezelfde dag of de dag na de vaccinatie. Dit treedt meestal op bij vaccinatie 2 en 3. Deze verschijnselen duren een dag. Paracetamol kan deze klachten verlichten. Ook ontwikkelen veel mensen een lokale huidreactie van de injectie in de huid. Dit gaat vanzelf over.
- Mitazalimab geeft vaak bijwerkingen die mild en voorbijgaand van aard zijn. In de meeste gevallen gaat het om kortdurende griepachtige verschijnselen met koorts, rillingen, hoofdpijn, vermoeidheidsklachten, jeuk en/of rugpijn. Deze symptomen treden op net na tot uren na de behandeling. Deze symptomen gaan over binnen een paar uur tot een aantal dagen. Daarnaast kunnen levertest afwijkingen optreden. Ook deze zijn mild en voorbijgaand van aard.
- De combinatie MesoPher/mitazalimab: beide middelen geven wanneer ze apart worden toegediend milde bijwerkingen. We weten niet hoe de bijwerkingen zullen zijn van deze combinatietherapie die u krijgt. Om eventuele risico's zo klein mogelijk te houden wordt de dosering van de mitazalimab gecontroleerd opgehoogd. We doen dit alleen als blijkt dat de lagere dosering veilig is en geen ernstige bijwerkingen geeft.

De volgende bijwerkingen komen weinig voor en kunnen ernstig zijn:

- De tumorbiopsen kunnen afhankelijk van de locatie van de tumor bijwerkingen geven. We zullen de meest veilige plek uitzoeken. In veel gevallen zal er een biopsie worden genomen van een toegankelijke leveruitzaaiing. Dit is een invasieve handeling waarbij bijwerkingen kunnen optreden, echter het risico op ernstige bijwerkingen is erg klein. Ernstige bijwerkingen zijn een bloeding, een infectie of een klaplong. De kans hierop is lager dan een procent. Het biopsie gebeurt vaak onder lokale verdoving, echter kan het toch als pijnlijk worden ervaren. Meer informatie over de biopsie vind u in **bijlage E**.

De combinatie van MesoPher en mitazalimab kan ook bijwerkingen hebben die we nu nog niet weten.



Proefpersoneninformatie

## 7. Wat zijn de voordelen en de nadelen als u meedoet aan het onderzoek?

Meedoen aan het onderzoek kan voordelen en nadelen hebben. Hieronder zetten we ze op een rij. Denk hier goed over na, en praat erover met anderen. Als u meedoet aan dit onderzoek betekent het niet dat uw ziekte ervan overgaat. Het is vooralsnog onduidelijk of deze therapie voor u de ziekte kan afremmen. Het doel van de studie is om de onderzoekers meer inzicht te geven in mogelijke nieuwe behandelingen van alveeskliekkanker.

Meedoen aan het onderzoek kan deze nadelen hebben:

- U kunt last krijgen van de bijwerkingen of nadelige effecten van de behandeling zoals beschreven in paragraaf 6.
- U kunt last hebben van de metingen tijdens het onderzoek. Bijvoorbeeld: bloedafname kan wat pijn doen. Of u kunt daardoor een bloeding krijgen.
- U kan ongemak ervaren van het huidbiopt dat we afnemen.
- Meedoen aan het onderzoek kost u extra tijd.
- U moet extra naar het ziekenhuis komen.
- U moet zich houden aan de afspraken die horen bij het onderzoek.

### *Wat zijn de risico's van onderzoeken die gebruik maken van straling?*

Bij CT scan gebruiken we röntgenstraling. In dit onderzoek krijgt u in totaal ongeveer 42 mSv aan straling. Dit komt overeen met ongeveer 8,4 mSv per CT scan. Ter vergelijking: de 'gewone' straling die iedereen in Nederland sowieso krijgt, is ongeveer ~2,5 mSv per jaar. Het kan geen kwaad als u voor een medische reden een onderzoek of behandeling met straling moet ondergaan.

- Krijgt u vaker een onderzoek met straling? Bespreek dan met de onderzoeker of het verstandig is dat u meedoet.
- De straling die we tijdens het onderzoek gebruiken kan leiden tot schade aan uw gezondheid. Maar dit is een klein risico. Wel adviseren we u de komende tijd niet nog een keer mee te doen aan een wetenschappelijk onderzoek met straling.

Het is mogelijk dat er tijdens het onderzoek toevallig iets wordt ontdekt dat niet direct van belang is voor het onderzoek maar wel voor uw gezondheid of die van uw familieleden. In dit geval zal uw eigen huisarts of specialist met u bespreken wat er verder moet gebeuren. De kosten hiervan vallen onder uw eigen zorgverzekering.

### *Wilt u niet meedoen?*

U beslist zelf of u meedoet aan het onderzoek. Wilt u niet meedoen? Dan krijgt u de gewone behandeling voor uitgezaaide alveeskliekkanker. Uw arts kan u meer vertellen over de behandelingsmogelijkheden die er zijn. En over de voor- en nadelen daarvan.



Proefpersoneninformatie

## 8. Wanneer stopt het onderzoek?

De onderzoeker laat het u weten als er nieuwe informatie over het onderzoek komt die belangrijk voor u is. De onderzoeker vraagt u daarna of u blijft meedoen.

In deze situaties stopt voor u het onderzoek:

- Alle onderzoeken volgens het schema zijn voorbij.
- Het einde van het hele onderzoek is bereikt.
- U bent zwanger geworden.
- U wilt zelf stoppen met het onderzoek. Dat mag op ieder moment. Meld dit dan meteen bij de onderzoeker. U hoeft er niet bij te vertellen waarom u stopt. U krijgt dan weer de gewone behandeling voor uitgezaaide alvleesklierkanker. De onderzoeker kan voor uw veiligheid nog een of meer controles afspreken.
- De onderzoeker vindt het beter voor u om te stoppen. De onderzoeker zal u nog wel uitnodigen voor een nacontrole.
- Een van de volgende instanties besluit dat het onderzoek moet stoppen:
  - Erasmus MC,
  - de overheid, of
  - de medisch-ethische commissie die het onderzoek beoordeelt.

*Wat gebeurt er als u stopt met het onderzoek?*

De onderzoekers gebruiken de gegevens en het lichaamsmateriaal zoals bloed en weefsel die tot het moment van stoppen zijn verzameld. Als u wilt, kan verzameld lichaamsmateriaal worden vernietigd. Geef dit door aan de onderzoeker.

Het hele onderzoek is afgelopen als alle deelnemers klaar zijn.

## 9. Wat gebeurt er na het onderzoek?

*Kunt u de medicijnen blijven gebruiken?*

De medicijnen die u heeft gebruikt bij het onderzoek, kunt u na het onderzoek niet blijven gebruiken. De onderzoeker bespreekt met u welke andere medische zorg u krijgt.

*Krijgt u de resultaten van het onderzoek?*

Ongeveer aan half jaar nadat de studie afgelopen is laat de onderzoeker u weten wat de belangrijkste uitkomsten zijn van het onderzoek. Wilt u dit niet weten? Zeg dat dan tegen de onderzoeker. Hij zal het u dan niet vertellen.

## 10. Wat doen we met uw gegevens en lichaamsmateriaal?

Doet u mee met het onderzoek? Dan geeft u ook toestemming om uw gegevens en lichaamsmateriaal te verzamelen, gebruiken en bewaren.





#### Proefpersoneninformatie

##### *Welke gegevens bewaren we?*

We bewaren deze gegevens:

- uw naam;
- uw geslacht;
- uw adres;
- uw geboortedatum;
- gegevens over uw gezondheid;
- (medische) gegevens die we tijdens het onderzoek verzamelen.

##### *Welk lichaamsmateriaal bewaren we?*

We bewaren buisjes bloed en stukjes weefsel (biopten).

##### *Waarom verzamelen, gebruiken en bewaren we uw gegevens en lichaamsmateriaal?*

We verzamelen, gebruiken en bewaren uw gegevens en uw lichaamsmateriaal om de vragen van dit onderzoek te kunnen beantwoorden. En om de resultaten te kunnen publiceren.

##### *Hoe beschermen we uw privacy?*

Om uw privacy te beschermen geven wij uw gegevens en uw lichaamsmateriaal een code. Op al uw gegevens en lichaamsmateriaal zetten we alleen deze code. De sleutel van de code bewaren we op een beveiligde plek in het ziekenhuis. Als we uw gegevens en lichaamsmateriaal verwerken, gebruiken we steeds alleen die code. Ook in rapporten en publicaties over het onderzoek kan niemand terughalen dat het over u ging.

##### *Wie kunnen uw gegevens zien?*

Sommige personen kunnen wel uw naam en andere persoonlijke gegevens zonder code inzien. Dit zijn mensen die controleren of de onderzoekers het onderzoek goed en betrouwbaar uitvoeren. Deze personen kunnen bij uw gegevens komen:

- Leden van de commissie die de veiligheid van het onderzoek in de gaten houdt.
- Een controleur die door de onderzoeker is ingehuurd of die voor de opdrachtgever werkt.
- Nationale en internationale toezichthoudende autoriteiten. Bijvoorbeeld de Inspectie Gezondheidszorg en Jeugd.
- De ziekenhuisadministratie. Bijvoorbeeld de secretaresses van de artsen die u behandelen.

Deze personen houden uw gegevens geheim. Wij vragen u voor deze inzage toestemming te geven.

##### *Hoelang bewaren we uw gegevens en lichaamsmateriaal?*

We bewaren uw gegevens 30 jaar in het ziekenhuis. Uw lichaamsmateriaal bewaren we in het ziekenhuis voor de duur van het onderzoek. . Zodra dit niet meer nodig is, vernietigen we uw lichaamsmateriaal tenzij u toestemming geeft voor het gebruik van uw lichaamsmateriaal voor ander onderzoek naar alveeskliekkanker zoals hieronder vermeld.

Proefpersoneninformatie

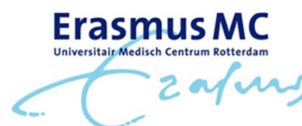

*Mogen we uw gegevens en lichaamsmateriaal gebruiken voor ander onderzoek?*

Uw gegevens en uw (overgebleven) lichaamsmateriaal kunnen na afloop van dit onderzoek ook nog van belang zijn voor ander wetenschappelijk onderzoek op het gebied van alvleesklierkanker. Daarvoor zullen uw gegevens 30 jaar en uw lichaamsmateriaal 15 jaar worden bewaard in het ziekenhuis.

We bewaren uw lichaamsmateriaal in het Erasmus MC voor verder onderzoek naar alvleesklierkanker en deze behandeling.

Ook hebben Amphera B.V. en Alligator Bioscience AB uw gecodeerde gegevens nodig om de middelen MesoPher en mitazalimab verder te kunnen ontwikkelen voor alvleesklierkanker. Uw identiteit valt niet te herleiden aan de hand van deze gegevens en uw direct identificeerbare persoonlijke gegevens worden niet aan Amphera B.V. en Alligator Bioscience AB ter beschikking gesteld.

In het toestemmingformulier geeft u aan of u dit goed vindt. Geeft u geen toestemming? Dan kunt u nog steeds meedoen met dit onderzoek. U krijgt dezelfde zorg.

*Wat gebeurt er bij onverwachte ontdekkingen?*

Tijdens het onderzoek kunnen we toevallig iets vinden dat belangrijk is voor uw gezondheid of voor de gezondheid van uw familieleden. De onderzoeker neemt dan contact op met uw specialist. U bespreekt dan met uw huisarts of specialist wat er moet gebeuren. U geeft met het formulier toestemming voor het informeren van uw huisarts of specialist.

*Kunt u uw toestemming voor het gebruik van uw gegevens weer intrekken?*

U kunt uw toestemming voor het gebruik van uw gegevens op ieder moment intrekken. Dit geldt voor het gebruik in dit onderzoek en voor het gebruik in ander onderzoek. Maar let op: trekt u uw toestemming in, en hebben onderzoekers dan al gegevens verzameld voor een onderzoek? Dan mogen zij deze gegevens nog wel gebruiken. Voor uw lichaamsmateriaal geldt dat de onderzoekers dit vernietigen nadat u uw toestemming intrekt. Maar zijn er dan al metingen gedaan met uw lichaamsmateriaal? Dan mag de onderzoeker de resultaten daarvan blijven gebruiken.

*We sturen uw gegevens naar landen buiten de Europese Unie*

In dit onderzoek sturen we mogelijk uw gecodeerde gegevens en lichaamsmateriaal ook naar landen buiten de Europese Unie zoals bijvoorbeeld de Verenigde Staten. In die landen gelden niet de privacyregels van de Europese Unie.

Bij gegevensverstrekking aan landen buiten de EU (zogenoemde 'derde landen'), zoals de VS, kan niet precies hetzelfde beschermingsniveau worden bereikt als binnen de EU. Wij spannen ons in om uw data ook buiten de EU zo goed mogelijk te beschermen. In ieder geval worden alleen uw versleutelde gegevens (dat wil zeggen: geen naam, adres en geboortedatum) doorgegeven. Het kan zo zijn dat we besluiten om lichaamsmateriaal naar de VS te sturen voor extra analyses. Dan worden er afspraken gemaakt met deze partijen die voldoen aan de EU-wetgeving. Ook zal al het materiaal gepseudonimiseerd worden en verstuurd worden volgens

Proefpersoneninformatie



een beveiligde route. Mocht u hiertegen toch bezwaar hebben, dan kunt u helaas niet aan het onderzoek deelnemen.

*Wilt u meer weten over uw privacy?*

- Wilt u meer weten over uw rechten bij de verwerking van persoonsgegevens? Kijk dan op [www.autoriteitpersoonsgegevens.nl](http://www.autoriteitpersoonsgegevens.nl).
- Heeft u vragen over uw rechten? Of heeft u een klacht over de verwerking van uw persoonsgegevens? Neem dan contact op met degene die verantwoordelijk is voor de verwerking van uw persoonsgegevens. Voor uw onderzoek is dat:
  - Het Erasmus MC. Zie **bijlage A** voor contactgegevens, en website.
- Als u klachten heeft over de verwerking van uw persoonsgegevens, raden we u aan om deze eerst te bespreken met het onderzoeksteam. U kunt ook naar de Functionaris Gegevensbescherming van het Erasmus MC gaan. Of u dient een klacht in bij de Autoriteit Persoonsgegevens.

*Waar vindt u meer informatie over het onderzoek?*

Op de volgende website(s) vindt u meer informatie over het onderzoek: [www.trialregister.nl](http://www.trialregister.nl). Na het onderzoek kan de website een samenvatting van de resultaten van dit onderzoek tonen. U vindt het onderzoek door te zoeken op REACTiVe-2.

### **11. Krijgt u een vergoeding als u meedoet aan het onderzoek?**

De onderzoeksmiddelen, extra testen en behandeling voor het onderzoek kosten u niets. U krijgt ook geen vergoeding als u meedoet aan dit onderzoek. Wel krijgt u een vergoeding voor uw extra reiskosten.

### **12. Bent u verzekerd tijdens het onderzoek?**

Voor iedereen die meedoet aan dit onderzoek is een verzekering afgesloten. De verzekering betaalt voor schade door het onderzoek. Maar niet voor alle schade. In **bijlage B** vindt u meer informatie over de verzekering en de uitzonderingen. Daar staat ook aan wie u schade kunt melden.

### **13. We informeren uw huisarts, behandelend specialist en apotheker**

De onderzoeker stuurt uw huisarts, behandelend specialist en apotheker een brief of e-mail] om te laten weten dat u meedoet aan het onderzoek. Dit is voor uw eigen veiligheid

### **14. Heeft u vragen?**

Vragen over het onderzoek kunt u stellen aan het onderzoeksteam. Wilt u advies van iemand die er geen belang bij heeft? Ga dan naar Prof. dr. Verhofstad. Hij weet veel over het onderzoek, maar werkt niet mee aan dit onderzoek.

Heeft u een klacht? Bespreek dit dan met de onderzoeker of de arts die u behandelt. Wilt u dit liever niet? Ga dan naar de klachtencommissie van uw ziekenhuis. In **bijlage A** staat waar u die kunt vinden.

Proefpersoneninformatie



### **15. Hoe geeft u toestemming voor het onderzoek?**

U kunt eerst rustig nadenken over dit onderzoek. Daarna vertelt u de onderzoeker of u de informatie begrijpt en of u wel of niet wilt meedoen. Wilt u meedoen? Dan vult u het toestemmingsformulier in dat u bij deze informatiebrief vindt. U en de onderzoeker krijgen allebei een getekende versie van deze toestemmingsverklaring.

Dank voor uw tijd.

Proefpersoneninformatie



## 16. Bijlagen bij deze informatie

- A. Contactgegevens Erasmus MC.
- B. Informatie over de verzekering.
- C. Schema onderzoekshandelingen.
- D. Achtergrond van het onderzoek
- E. Informatie over de leukaferese.
- F. Informatie over de biopsie.
- G. Informatie over de huidtest en huidbiopt
- H. Toestemmingsformulier.

Proefpersoneninformatie



## **Bijlage A: contactgegevens voor Erasmus MC**

### Hoofdonderzoeker

Indien u voor of tijdens het onderzoek vragen of klachten heeft over het onderzoek kunt u tijdens kantooruren contact opnemen met het onderzoeksteam:

- Dr. M. Lolkema, hoofdonderzoeker, telefoonnummer 010-7034897.

### Onafhankelijk arts

Als u twijfelt over deelname kunt u een onafhankelijke arts raadplegen, die zelf niet bij het onderzoek betrokken is, maar die wel deskundig is op het gebied van dit onderzoek. Ook als u voor of tijdens de studie vragen heeft die u liever niet aan de onderzoekers stelt, kunt u contact opnemen met de onafhankelijke arts:

- Prof. dr. M.H.J Verhofstad, traumachirurg, Erasmus MC, telefoonnummer 010-7031050.

### Klachten

Als u niet tevreden bent over het onderzoek kunt u terecht bij de onafhankelijke klachtencommissie van het Erasmus MC. De klachtencommissie is te bereiken op telefoonnummer 010-7033198.

### Functionaris Gegevensbescherming Erasmus MC:

Bereikbaar via Secretariaat Juridische Zaken

Telefoonnummer 010-7034986

Proefpersoneninformatie



## Bijlage B: informatie over de verzekering

Het Erasmus MC heeft een verzekering afgesloten voor iedereen die meedoet aan het onderzoek. De verzekering betaalt de schade die u heeft doordat u aan het onderzoek meedeed. Het gaat om schade die u krijgt tijdens het onderzoek, of binnen 4 jaar na het onderzoek. U moet schade binnen 4 jaar melden bij de verzekeraar.

Heeft u schade door het onderzoek? Meld dit dan bij deze verzekeraar:

De verzekeraar van het onderzoek is:

|                 |                                                                                                                                                                        |
|-----------------|------------------------------------------------------------------------------------------------------------------------------------------------------------------------|
| Naam:           | CNA Insurance Company Europe S.A.                                                                                                                                      |
| Adres:          | Polarisavenue 140, 2134 JX Hoofddorp                                                                                                                                   |
| Telefoonnummer: | 023-3036004 of 06-38059413                                                                                                                                             |
| E-mail:         | <a href="mailto:ClaimsNetherlands@cnaahardy.com">ClaimsNetherlands@cnaahardy.com</a> of <a href="mailto:esther.vanherk@cnaeurope.com">esther.vanherk@cnaeurope.com</a> |
| Contactpersoon: | Mevrouw Esther van Herk                                                                                                                                                |

De verzekering betaalt maximaal van € 650.000 per persoon en € 5.000.000 voor het hele onderzoek (en € 7.500.000 per jaar voor alle onderzoeken van dezelfde opdrachtgever).

Let op: de verzekering dekt de volgende schade **niet**:

- Schade door een risico waarover we u informatie hebben gegeven in deze brief. Maar dit geldt niet als het risico groter bleek te zijn dan we van tevoren dachten. Of als het risico heel onwaarschijnlijk was.
- Schade aan uw gezondheid die ook zou zijn ontstaan als u niet aan het onderzoek had meegedaan.
- Schade die ontstaat doordat u aanwijzingen of instructies niet of niet goed opvolgde.
- Schade aan de gezondheid van uw kinderen of kleinkinderen.
- Schade door een behandelmethode die al bestaat. Of door onderzoek naar een behandelmethode die al bestaat.

Deze bepalingen staan in het 'Besluit verplichte verzekering bij medisch-wetenschappelijk onderzoek met mensen 2015'. Dit besluit staat in de Wettenbank van de overheid (<https://wetten.overheid.nl>).

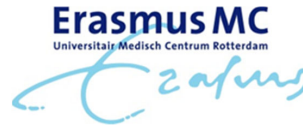

Proefpersoneninformatie

**Bijlage C: Schema onderzoekshandelingen**

| Week                           | -13 | -11 | -9 | -8 | -1 | 0 | 2 | 4 | 6 | 7 | 12 | 13 | 16 | 18 | 20 | 21 | 28 | 30 | 36 |
|--------------------------------|-----|-----|----|----|----|---|---|---|---|---|----|----|----|----|----|----|----|----|----|
| Visite                         | 0   | 1   | 2  | 3  | 4  | 5 | 6 | 7 | 8 | 9 | 10 | 11 | 12 | 13 | 14 | 15 | 16 | 17 |    |
| Informatievoorziening          | X   |     |    |    |    |   |   |   |   |   |    |    |    |    |    |    |    |    |    |
| Informed consent tekenen       |     | X   |    |    |    |   |   |   |   |   |    |    |    |    |    |    |    |    |    |
| Tumor biopsie                  |     |     |    |    | X  |   |   |   | X |   |    |    |    |    |    |    |    |    |    |
| Huidtest en huidbiopsie*       |     |     |    |    |    |   |   |   | X |   |    |    |    |    |    |    |    |    |    |
| Leukaferese                    |     |     | X  |    |    |   |   |   |   |   |    |    |    |    |    |    |    |    |    |
| Lichamelijk onderzoek/metingen |     | X   |    |    |    | X | X | X |   |   |    | X  | X  |    |    | X  | X  |    |    |
| Bloedafname routine onderzoek  |     | X   | X  |    | X  | X | X | X |   |   | X  |    | X  |    | X  |    | X  |    | X  |
| Bloedafname immuun onderzoek   |     |     | X  |    |    | X | X | X | X |   |    |    | X  | X  |    |    | X  | X  |    |
| Urine onderzoek                |     | X   | X  |    | X  | X | X | X |   |   |    |    | X  |    |    |    | X  |    | X  |
| Start chemotherapie **         |     |     | X  | X  |    |   |   |   |   |   |    |    |    |    |    |    |    |    |    |
| MesoPher/Mitazalimab gift      |     |     |    |    |    | X | X | X |   |   |    |    | X  |    |    |    | X  |    |    |
| CT-scan                        |     |     |    |    | X  |   |   |   | X |   | X  |    |    |    | X  |    |    |    | X  |
| CT-scan uitslag                |     |     |    |    |    |   |   |   |   | X |    | X  |    |    |    | X  |    |    |    |
| Laatste studiebezoek           |     |     |    |    |    |   |   |   |   |   |    |    |    |    |    |    |    |    | X  |

\* alleen bij patienten waarbij geen tweede tumorbiopsie kan worden afgenomen

\*\* in overleg met uw oncoloog wordt besloten of u chemotherapie ontvangt om de tijd tot de behandelphase te overbruggen

**Aanloofphase:** screening, leukaferese, opkweken witte bloedcellen (+ 6 weken), eventueel chemotherapie, tumor biopsie**Behandelfase:** MesoPher/Mitazalimab giften, immuun monitoring, CT-scans, tumor biopsie, 2e huidtest



Proefpersoneninformatie



## Bijlage D: Achtergrond van het onderzoek

Pancreaskanker kent helaas een erg slechte prognose. De 5-jaars overleving ligt rond de 9%. De oorzaak van de slechte prognose is zeer waarschijnlijk multifactorieel. De ziekte wordt vaak laat ontdekt en is daardoor niet meer te behandelen met een operatie. Ook reageert de tumor in veel gevallen slecht op behandelingen als chemotherapie of bestraling. Met de komst van nieuwe vormen van chemotherapie, is de prognose voor patiënten gelukkig verbeterd, maar er zijn nog veel stappen te zetten.

Ons immuunsysteem speelt een belangrijke rol bij de bescherming tegen bacteriën en virussen, maar ook tegen kanker. Een kankercel wordt door onze immuuncellen herkend als lichaamsvreemd en onschadelijk gemaakt. Als de kankercel aan ons immuunsysteem kan ontsnappen dan kan hij uitgroeien tot een tumor. De slechte prognose van alveesklierkanker heeft waarschijnlijk ook te maken met de interactie van de kanker met ons immuunsysteem. De kanker onderdrukt de werking van het immuunsysteem tegen de kanker. Het gegeven dat ons immuunsysteem een belangrijke rol speelt bij alveesklierkanker willen we gebruiken bij het ontwikkelen van nieuwe vormen van behandeling. Met immuuntherapie proberen we ons immuunsysteem te “trainen” om zo de tumorcellen beter te herkennen en aan te vallen.

In dit onderzoek willen we een combinatie van 2 verschillende immuuntherapieën gaan onderzoeken bij u. De eerste is dendritische celtherapie. Dendritische cellen zijn een bepaalde type van uw witte bloedcellen, waarvan wij geloven dat ze een cruciale rol kunnen spelen tegen kanker. We gebruiken uw eigen witte bloedcellen om op te kweken in het laboratorium met een bepaalde hulpstof tot de dendritische cellen die we willen hebben. De hulpstof is gemaakt uit cellijnen van het mesothelioom (longvlieskanker). Deze cellijn is in grote hoeveelheden beschikbaar en heeft veel eigenschappen die lijken op alveesklierkanker, waardoor deze cellijn geschikt is om te gebruiken voor deze toepassing. Hierna geven we deze dendritische cellen aan u terug. In de REACtiVe studie hebben we dit gedaan in patiënten met alveesklierkanker nadat de tumor met een operatie was verwijderd. Het blijkt haalbaar te zijn om de cellen goed te produceren en aan patiënten toe te dienen. Ook is het veilig gebleken met beperkte bijwerkingen. Over de effectiviteit van dendritische celtherapie bij alveesklierkanker kunnen we nog geen uitspraken doen.

Naast dendritische cellen geven wij u een CD40 agonist (mitazalimab). Mitazalimab is een eiwit. Mitazalimab bindt aan eiwitten die we vinden op een heel scala immuuncellen. Hierdoor kan het de werking van deze cellen versterken. De producent van het middel heeft in een voorgaande studie de veiligheid onderzocht. Hierbij werd het middel in de bloedbaan toegediend aan proefpersonen met verschillende typen tumoren. De dosering werd hier stapsgewijs opgevoerd. De toediening van mitazalimab bleek veilig en de bijwerkingen waren over het algemeen mild. Over de bijwerkingen die u kunt verwachten van dendritische celtherapie en mitazalimab leest u later in deze informatiebrief meer.



## Proefpersoneninformatie

Wij hebben deze combinatietherapie onderzocht in een muismodel voor alveesklierkanker. Beide middelen afzonderlijk hadden geen effect. De combinatie zorgde voor een verkleining van de tumoren en een verbetering van de overleving in deze muizen. Deze goede resultaten in muizen met alveesklierkanker hebben ervoor gezorgd dat wij dit nu ook willen onderzoeken in mensen.

Beide strategieën kunnen ervoor zorgen dat het immuunsysteem de kankercellen aanvalt. Door de combinatie hopen we dat beide therapieën elkaars effect versterken. Echter door het combineren van de middelen kunnen ook de bijwerkingen toenemen. Daarom is onze eerste onderzoeksvraag om de veiligheid te onderzoeken. We zullen met een lage dosering beginnen en als dit veilig blijkt langzaam de dosering opvoeren om de risico's voor de proefpersonen zo klein mogelijk te maken.



Proefpersoneninformatie

## **Bijlage E: Informatie over de leukaferese**

In overleg met uw behandelend arts en de artsen van het Erasmus MC hebt u besloten deel te nemen aan onderzoek waarbij u met dendritische cellen behandeld zult worden. Om deze cellen te verkrijgen is een leukaferese op de hemaferese afdeling van het Erasmus Medisch Centrum te Rotterdam noodzakelijk.

In deze folder vindt u informatie over deze poliklinische procedure. Uitgelegd wordt hoe een gedeelte van de witte bloedcellen uit het bloed wordt gehaald en hoe hier dendritische cellen van gemaakt kunnen worden ten behoeve van immunotherapie.

Heeft u na het lezen van deze folder nog vragen, dan kunt u deze te allen tijde aan de artsen en verpleegkundige, die bij het onderzoek betrokken zijn, vragen.

### *De bloedvorming*

In bloed bevinden zich cellen en plasma. Plasma bestaat voor het grootste deel uit water waarin voedingsstoffen, vitaminen, hormonen en mineralen opgelost zijn. De cellen die in het bloed zitten kunnen onderverdeeld worden in rode bloedcellen (erythrocyten), witte bloedcellen (leukocyten) en bloedplaatjes (trombocyten). De rode bloedcellen zijn nodig voor het zuurstoftransport naar de verschillende organen. Bloedplaatjes spelen een belangrijke rol bij de bloedstolling. Witte bloedcellen zijn nog bij de afweer tegen ziekteverwekkers. De witte bloedcellen zijn onder te verdelen in verschillende soorten o.a. lymfocyten en granulocyten.

Dendritische cellen vallen onder de witte bloedcellen en dragen bij aan het op gang komen van de afweerreactie. Dendritische cellen zijn heel goed in staat om stukjes van "vreemde indringers" op te nemen (o.a. stukjes van bacteriën, virussen of kankercellen). Door deze "vreemde" stukken aan de andere witte bloedcellen (m.n. T-lymfocyten) te presenteren kunnen ze een specifieke afweerreactie tegen deze indringers op gang brengen.

### *De leukaferese*

Een leukaferese is een poliklinische medische behandeling waarbij patiënten door middel van twee infuuslijnen verbonden worden aan het hemaferese-apparaat. Via de ene lijn wordt het bloed in het apparaat geleid. In het apparaat bevindt zich een centrifuge, die door middel van zijn draaiing heel selectief bepaalde witte bloedcellen uit het bloed kan scheppen. Vervolgens wordt de rest van het bloed weer via de tweede infuuslijn aan de patiënt terug gegeven. Naargelang de hoeveelheid cellen die afgenomen moet worden duurt de gehele procedure enkele uren (ongeveer 4 uur).

Enkele weken voor de leukaferese bezoekt u de afdeling voor inspectie van de bloedvaten op de armen (om een inschatting te maken over de mogelijkheden tot het plaatsen van de twee infuusnaalden). Tevens krijgt u persoonlijke uitleg over de procedure en is er ruimte voor het stellen van vragen.



Proefpersoneninformatie

#### *Voor de procedure*

Omdat de procedure enige tijd in beslag neemt bent u vrij iemand mee te nemen om u gezelschap te houden.

Tijdens de procedure is toilet bezoek niet mogelijk, omdat u door twee infuuslijnen aan het hemaferese-apparaat verbonden bent. Wij adviseren dan ook om voor de leukaferese het toilet te bezoeken en tijdens de leukaferese niet veel te drinken (uiteraard is het mogelijk gebruik te maken van po of urinaal).

Voor de start van de leukaferese wordt standaard bloed afgenomen en de bloeddruk gecontroleerd.

#### *Tijdens de procedure*

De procedure begint altijd tussen 9.00 en 9.30 uur. Gedurende de behandeling zit u op een gemakkelijke stoel.

De verpleegkundige van de hemaferese afdeling zullen twee infusen plaatsen en deze aansluiten op het hemaferese-apparaat. Door middel van een pompsysteem zal het bloed vervolgens door de machine geleid worden. Hiermee begint de bloedscheiding. Een deel van de witte bloedcellen zal door het apparaat uit het bloed gehaald worden. Het overgrote deel (plasma, bloedplaatjes en rode bloedcellen) worden via het infuus op de andere arm weer terug het lichaam in geleid.

Gedurende de procedure wordt er in totaal 9 liter bloed verwerkt. Alleen een klein gedeelte van de witte bloedcellen (ongeveer 150 milliliter) blijft achter in het apparaat en zal vervolgens in het laboratorium verwerkt worden.

#### *Na de procedure*

Omdat de meeste mensen na de procedure lichte vermoeidheidsklachten hebben, adviseren we niet zelf naar huis te rijden. De afgenomen cellen worden opgehaald door de artsen/onderzoekers die bij het onderzoek betrokken zijn. Zij zullen de cellen in het laboratorium (onder steriele omstandigheden) opkweken tot dendritische cellen (meer informatie hierover vind u in het patiënt-informatie-formulier, wat u van uw behandelend arts ontvangen hebt).

#### *Bijwerkingen*

Tijdens de leukaferese wordt er druppelsgewijs het antistollingsmiddel citraat aan het afgenomen bloed toegevoegd. Wanneer het bloed uit het apparaat weer terug gegeven wordt, komt het antistollingsmiddel ook in uw bloed terecht. Sommige mensen krijgen hierdoor een calciumverlaging met als gevolg last van tintelende lippen of prikkelende vingertoppen. Een enkeling krijgt een gevoel van honger, duizeligheid of andere klachten. Het is belangrijk deze klachten te melden aan de verpleegkundige. U krijgt dan via het infuus een beetje calcium

Proefpersoneninformatie



toegediend waardoor de onbehagelijke symptomen snel verdwijnen. Omdat de klachten zelden voorkomen wordt calcium niet preventief aan iedereen gegeven.

Heeft u na het lezen van deze folder nog vragen, dan kunt u zich wenden tot een van de medewerkers van de hemaferese-afdeling of tot de artsen en onderzoekers die betrokken zijn bij het onderzoek.



Proefpersoneninformatie

## **Bijlage F: Informatie over de biopsie**

*Een biopsie uit de lever onder echogeleiding is het uit de lever nemen van een klein stukje weefsel van een afwijking in de lever of juist van het leverweefsel zelf.*

### **Vorbereiding**

#### *Roesje*

Als u dat wilt, kunt u een roesje krijgen voor de biopsie. Dit kunt u aangeven bij de arts die het onderzoek aanvraagt.

#### *Eten en drinken*

Wanneer er geen roesje gegeven wordt mag u op de dag van het onderzoek een licht ontbijt of lichte lunch nemen. Wanneer de biopsie onder een roesje plaatsvindt, moet u minstens 4 uur voor de ingreep nuchter zijn. Dit betekent dat u op de dag van het onderzoek niets mag eten of drinken tot de ingreep uitgevoerd is.

#### *Bloedverdunners*

Gebruikt u bloedverdunners (bijvoorbeeld Marcoumar of Sintrom)? Overleg dan van te voren met uw specialist of u hier tijdelijk mee moet stoppen. Er wordt dan ook ruim voor de biopsie bloed geprikt om de stolling van het bloed te controleren.

#### *Kleding*

Omdat er gewerkt wordt in een steriele omgeving is het noodzakelijk dat u in schone (gewassen) kleding naar de onderzoekskamer komt. Ook is het handig als de kleding comfortabel en niet te strak zit.

### **Wat we gaan doen**

Bij een biopsie van de lever onder echogeleiding wordt een klein stukje weefsel uit de afwijking in de lever of van het leverweefsel genomen. Dit gebeurt op geleide van een echo.

#### *Wat is het doel?*

Het doel is om vast te stellen of er een afwijking is en zo ja, wat de afwijking inhoudt.

### **Verloop van het onderzoek**

De radioloog of laborant desinfecteert de huid en de huid wordt plaatselijk verdoofd. Om het gebied goed te kunnen bepalen wordt gebruik gemaakt van echografie (geluidsgolven). De radioloog plaatst de echokop op de huid en prikt de juiste plaats aan met een naald. Vervolgens wordt (een stukje) weefsel met een speciale biopsie naald weggenomen. Soms vraagt de radioloog u de adem even in te houden. Meestal wordt er meerdere malen een biopt genomen om voldoende materiaal te krijgen. Het materiaal wordt na het afnemen naar het laboratorium gestuurd voor verder onderzoek.



Proefpersoneninformatie

#### *Duur van het onderzoek*

Het onderzoek duurt ongeveer 30 minuten.

#### **Na het onderzoek**

##### *Nazorg en controles*

Na het onderzoek moet u minimaal 1 uur bedrust houden. Dit is om de kans op een nabloeding zo klein mogelijk te houden. U mag na het onderzoek, in overleg met uw arts, weer gewoon eten en drinken.

#### **Bijwerkingen en complicaties**

##### *Tijdens het onderzoek*

Bij iedere biopsie bestaat een kleine kans op een bloeding, de kans is echter heel gering. Het team dat het onderzoek uitvoert, is gespecialiseerd in het voorkomen en het behandelen van dergelijke problemen. De specialist die het onderzoek heeft geadviseerd, weegt ook altijd de geringe kans op dergelijke complicaties goed af tegen de voordelen van het onderzoek.

##### *Na het onderzoek thuis*

Krijgt u thuis toch een complicatie? Belt u dan naar de polikliniek radiologie. U wordt dan doorverbonden met de physician assistent van interventie radiologie. Buiten kantoor tijden belt u naar het algemene nummer van het Erasmus MC. U vraagt dan naar de dienstdoende radioloog.

#### **De uitslag**

Na het onderzoek wordt het afgenomen materiaal naar het laboratorium opgestuurd voor verder onderzoek. De duur van de uitslag is afhankelijk van het soort materiaal en duurt vaak van enkele dagen tot ongeveer 2 weken. De uitslag krijgt u van uw behandelend arts.

#### **Contact**

Polikliniek radiologie (van 08.00 - 16.30 uur) (010) 704 20 06. Algemeen nummer Erasmus MC (010) 704 0 704.

Proefpersoneninformatie

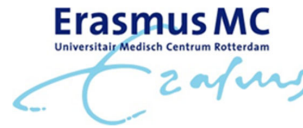**Bijlage G: Informatie over de huidtest en huidbiopt**

Indien we bij u geen tweede biopsie kunnen afnemen van een uitzaaiing in de lever (soms lukt het niet goed dit aan te prikken) dan zullen we bij u een huidtest met huidbiopt uitvoeren. Op deze manier kunnen we extra informatie over de mogelijke effectiviteit van de therapie krijgen. We zullen in dat geval deze huidtest zetten na 3 giften van de studiemedicatie. We spuiten met de huidtest 2 middelen in: 1) MesoPher (positieve controle) en 2) fysiologisch zout (negatieve controle).

Als u een positieve huidreactie ontwikkeld na 48 uur op de MesoPher injectie, dan neemt de arts-onderzoeker een klein huidbiopt af. Hiervoor wordt de huid eerst schoongemaakt met alcohol, vervolgens wordt de huid verdoofd en dan neemt de arts-onderzoeker met een 3mm stansbiopteur het huidbiopt af. De verdoving is gevoelig, maar deze handeling is ongevaarlijk en kent geen bijwerkingen. Het huidbiopt zal hierna worden opgeslagen.

Het huidbiopt zal later door het studieteam onderzocht worden op de aanwezigheid van specifieke immuuncellen.





Proefpersoneninformatie

### Bijlage H: toestemmingsformulier proefpersoon

Behorende bij de REACTiVe-2 studie: combinatie immunotherapie voor patiënten met uitgezaaid pancreaskanker.

- Ik heb de informatiebrief gelezen. Ook kon ik vragen stellen. Mijn vragen zijn goed genoeg beantwoord. Ik had genoeg tijd om te beslissen of ik meedoe.
- Ik weet dat meedoen vrijwillig is. Ook weet ik dat ik op ieder moment kan beslissen om toch niet mee te doen met het onderzoek. Of om ermee te stoppen. Ik hoef dan niet te zeggen waarom ik wil stoppen.
- Ik geef de onderzoeker toestemming om mijn huisarts, specialist die mij behandelt en apotheker te laten weten dat ik meedoe aan dit onderzoek.
- Ik geef de onderzoeker toestemming om mijn huisarts of specialist informatie te geven over onverwachte bevindingen uit het onderzoek die van belang zijn voor mijn gezondheid.
- Ik geef de onderzoekers toestemming om mijn gegevens en lichaamsmateriaal te verzamelen en gebruiken. De onderzoekers doen dit alleen om de onderzoeksvraag van dit onderzoek te beantwoorden.
- Ik geef toestemming om mijn gegevens en lichaamsmateriaal te delen met landen binnen en buiten de Europese Unie.
- Ik weet dat voor de controle van het onderzoek sommige mensen al mijn gegevens kunnen inzien. Die mensen staan in deze informatiebrief. Ik geef deze mensen toestemming om mijn gegevens in te zien voor deze controle.
- Ik weet dat ik niet zwanger mag worden/mijn partner niet zwanger mag maken tijdens het onderzoek.
- De onderzoeker heeft met mij besproken hoe ik het beste voorkom dat ik zwanger word/dat mijn partner zwanger wordt.
- Wilt u in de tabel hieronder ja of nee aankruisen?

|                                                                                                                                                                                                                |                             |                              |
|----------------------------------------------------------------------------------------------------------------------------------------------------------------------------------------------------------------|-----------------------------|------------------------------|
| Ik geef toestemming om mijn gegevens te bewaren om dit te gebruiken voor ander onderzoek, zoals in de informatiebrief staat.                                                                                   | Ja <input type="checkbox"/> | Nee <input type="checkbox"/> |
| Ik geef toestemming om mijn (overgebleven) lichaamsmateriaal te bewaren om dit te gebruiken voor ander onderzoek, zoals in de informatiebrief staat. Het lichaamsmateriaal wordt daarvoor nog 15 jaar bewaard. | Ja <input type="checkbox"/> | Nee <input type="checkbox"/> |
| Ik geef toestemming om mijn gecodeerde gegevens te delen met Amphera B.V. en Alligator Biosciences AB om de middelen MesoPher en mitazalimab verder te kunnen ontwikkelen.                                     | Ja <input type="checkbox"/> | Nee <input type="checkbox"/> |
| Ik geef toestemming om mij eventueel na dit onderzoek te vragen of ik wil meedoen met een vervolgonderzoek.                                                                                                    | Ja <input type="checkbox"/> | Nee <input type="checkbox"/> |

- Ik wil meedoen aan dit onderzoek.

Mijn naam is (proefpersoon): .....

Handtekening: .....

Datum : \_\_ / \_\_ / \_\_

Ik verklaar dat ik deze proefpersoon volledig heb geïnformeerd over het genoemde onderzoek. Wordt er tijdens het onderzoek informatie bekend die de toestemming van de proefpersoon kan beïnvloeden? Dan laat ik dit op tijd weten aan deze proefpersoon.



Proefpersoneninformatie

Naam onderzoeker (of diens vertegenwoordiger): .....

Handtekening: .....

Datum: \_\_ / \_\_ / \_\_

-----  
*De proefpersoon krijgt een volledige informatiebrief mee, samen met een getekende versie van het toestemmingsformulier.*
